# Supplementary material for: Development of support material for health professionals who are implementing Shared Decision-making in breast cancer screening: validation using the Delphi technique
Source: PubMed Central journal article supplement (PMC8808455; doi:10.1136/bmjopen-2021-052566), 2022-02-01

# Guía práctica de implementación de la TDC para profesionales sanitarios

## 1 Crear equipo

### Comunicar la necesidad de tomar una decisión

- Introduzca la posibilidad de tomar decisiones acerca de su salud
- Comente los factores de riesgo y los que le afectan en particular
- Resalte que la acompañará en todo momento y puede contar con el apoyo de familiares u otros profesionales

## 3 Tomar una decisión

### Tomar una decisión compartida respecto a la mamografía

- Dé el tiempo necesario para permitir la reflexión
- Aclare las dudas y valore las preferencias
- Diseñe un plan de seguimiento de la decisión

*“Usted tiene la opción de decidir si participar o no en el programa de cribado de cáncer de mama.”*

*“Vamos a explorar conjuntamente los beneficios y efectos adversos del programa del cribado de cáncer de mama y resolveremos las dudas que usted tenga. La acompañaré a tomar una decisión teniendo en cuenta sus preferencias y valores”*

*“Ya hemos revisado las ventajas y desventajas relacionadas con la detección precoz del cáncer de mama ¿Siente que ya puede tomar una decisión? ¿Cuál es su elección? No es necesario que tome la decisión ahora. Si cree que necesita más tiempo, podemos tomarla más adelante y así usted puede comentarlo con alguna persona de su interés”*

## 2 Plantear opciones y explorar preferencias

### Informar de la opción de acudir o no a la mamografía

- Explore los conocimientos de la mujer sobre la mamografía
- Introduzca efectos adversos y beneficios de la mamografía a través de una Herramienta de Ayuda a la Toma de Decisiones (HATD)
- Considere las preferencias, creencias, valores y miedos de la mujer sobre la mamografía
- Resuma las opciones y compruebe si la mujer ha comprendido la nueva información

### Competencias Relacionales Transversales

Empatía | Escucha activa | Asertividad | Retroalimentación | Adaptación del lenguaje | Contacto visual

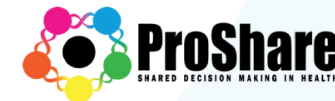

# Guía práctica de implementación de la TDC para profesionales sanitarios

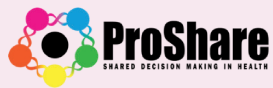

## Resultados

| Fase de la TDC                                        | Puntos                   | Interpretación                                                                                                                                                                                      |
|-------------------------------------------------------|--------------------------|-----------------------------------------------------------------------------------------------------------------------------------------------------------------------------------------------------|
| Fase 1<br>"Crear equipo"                              | <input type="checkbox"/> | 3 a 12 puntos:<br>sin adherencia a la TDC<br>13 a 18 puntos:<br>adherente a la TDC                                                                                                                  |
| Fase 2<br>"Plantear opciones y explorar preferencias" | <input type="checkbox"/> | 3 a 12 puntos:<br>sin adherencia a la TDC<br>13 a 18 puntos:<br>adherente a la TDC                                                                                                                  |
| Fase 3<br>"Tomar una decisión"                        | <input type="checkbox"/> | 3 a 12 puntos:<br>sin adherencia a la TDC<br>13 a 18 puntos:<br>adherente a la TDC                                                                                                                  |
| <b>Puntuación total:</b>                              | <input type="checkbox"/> | <b>9 a 27:</b><br>Falta de adherencia a la TDC<br><b>28 a 36:</b><br>Indiferencia a la TDC<br><b>37 a 45:</b><br>Leve adherencia a la TDC<br><b>46 a 54:</b><br>Fuerte adherencia a favor de la TDC |

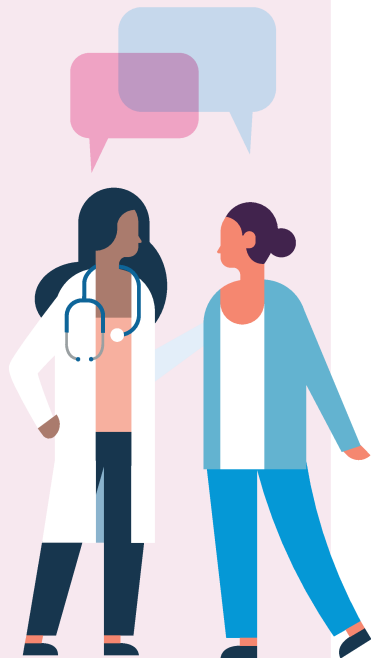

## Criterio

| Criterio                                                                                                                   | Puntos*                  |                          |                          |                          |                          |                          |
|----------------------------------------------------------------------------------------------------------------------------|--------------------------|--------------------------|--------------------------|--------------------------|--------------------------|--------------------------|
|                                                                                                                            | 1                        | 2                        | 3                        | 4                        | 5                        | 6                        |
| Informé claramente a la mujer de la necesidad de tomar una decisión sobre su participación en el cribado de cáncer de mama | <input type="checkbox"/> | <input type="checkbox"/> | <input type="checkbox"/> | <input type="checkbox"/> | <input type="checkbox"/> | <input type="checkbox"/> |
| Pregunté a la mujer de forma precisa cómo le gustaría participar en la toma de decisiones                                  | <input type="checkbox"/> | <input type="checkbox"/> | <input type="checkbox"/> | <input type="checkbox"/> | <input type="checkbox"/> | <input type="checkbox"/> |
| Informé a la mujer que existe la opción de participar o no en el cribado                                                   | <input type="checkbox"/> | <input type="checkbox"/> | <input type="checkbox"/> | <input type="checkbox"/> | <input type="checkbox"/> | <input type="checkbox"/> |
| Explicué claramente a la mujer las ventajas y desventajas de cada opción                                                   | <input type="checkbox"/> | <input type="checkbox"/> | <input type="checkbox"/> | <input type="checkbox"/> | <input type="checkbox"/> | <input type="checkbox"/> |
| Ayudé a la mujer a entender toda la información sobre beneficios y efectos adversos                                        | <input type="checkbox"/> | <input type="checkbox"/> | <input type="checkbox"/> | <input type="checkbox"/> | <input type="checkbox"/> | <input type="checkbox"/> |
| Pregunté a la mujer qué opción prefería                                                                                    | <input type="checkbox"/> | <input type="checkbox"/> | <input type="checkbox"/> | <input type="checkbox"/> | <input type="checkbox"/> | <input type="checkbox"/> |
| La mujer y yo hemos valorado ampliamente todas las opciones                                                                | <input type="checkbox"/> | <input type="checkbox"/> | <input type="checkbox"/> | <input type="checkbox"/> | <input type="checkbox"/> | <input type="checkbox"/> |
| La mujer y yo hemos escogido conjuntamente una opción                                                                      | <input type="checkbox"/> | <input type="checkbox"/> | <input type="checkbox"/> | <input type="checkbox"/> | <input type="checkbox"/> | <input type="checkbox"/> |
| La mujer y yo nos hemos puesto de acuerdo sobre el seguimiento de su atención sanitaria posterior                          | <input type="checkbox"/> | <input type="checkbox"/> | <input type="checkbox"/> | <input type="checkbox"/> | <input type="checkbox"/> | <input type="checkbox"/> |

\* La puntuación va de: "Totalmente en desacuerdo" (1) a "Totalmente de acuerdo" (6)

De las Cuevas C, Perestelo-Perez L, Rivero-Santana A, Cebolla-Martí A, Scholl I, Härter M. Validation of the Spanish version of the 9-item Shared Decision-Making Questionnaire. *Health Expect [Internet]*. 2015;18(6):2143–53.

Available from: <http://www.ncbi.nlm.nih.gov/pubmed/24593044>

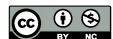

Supplement: bmjopen-2021-052566supp003.pdf [file bmjopen-2021-052566supp003.pdf]
