# Supplementary material for: Development of support material for health professionals who are implementing Shared Decision-making in breast cancer screening: validation using the Delphi technique
Source: PubMed Central journal article supplement (PMC8808455; doi:10.1136/bmjopen-2021-052566), 2022-02-01

# La participación de los profesionales de la salud en la Toma de Decisiones Compartida en el cribado de cáncer de mama

Manual de apoyo para implementación de la Toma de Decisiones Compartida

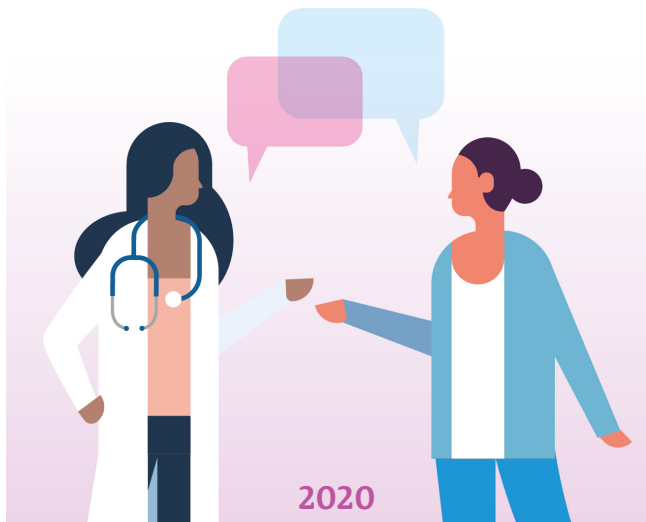



# La participación de los profesionales de la salud en la Toma de Decisiones Compartida en el cribado de cáncer de mama

Manual de apoyo para implementación de la Toma de Decisiones Compartida

2020

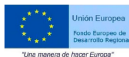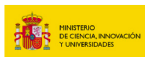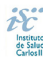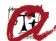

UNIVERSITAT  
ROVIRA I VIRGILI

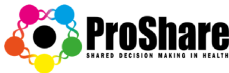

## AUTORES

María José Hernández-Leal<sup>1,a,b</sup>, María José Pérez-Lacasta<sup>2,a,c</sup>,  
Misericòrdia Carles-Lavila<sup>3,a,b,c</sup> on behalf of the ProShare  
Group.

1. PhD student, Msc and Bsc Nursing. Mail: mariajose.hernandez@urv.cat
2. PhD, Mail: mariajose.perez@urv.cat
3. PhD. Mail: misericordia.carles@urv.cat
  - a. Department of Economics, Universitat Rovira i Virgili.
  - b. Centre de Recerca en Economia i Sostenibilitat (ECO-SOS).
  - c. Grup de Recerca en Anàlisi Estadístic i Econòmic en Salut (GRAEES).

### Equipo de investigación ProShare:

Misericòrdia Carles Lavila  
Núria Codern-Bové  
María Feijoo  
María José Hernández Leal  
María José Pérez Lacasta  
Roger Pla  
Vanessa Ramos García  
Carmen Vidal

### Cómo citar este documento:

Hernández-Leal MJ, Carles-Lavila M, Pérez-Lacasta M. La participación de los profesionales de la salud en la Toma de Decisiones Compartida en el cribado de cáncer de mama: Manual de apoyo para implementación de la TDC. España: María José Hernández editor; 2020.

## EVALUADORES EXTERNOS

### **Dra. Lilisbeth Perestelo-Pérez**

Servicio de Evaluación y Planificación.  
Dirección del Servicio Canario de la Salud, España.  
Red de Investigación en Servicios de Salud en Enfermedades Crónicas (REDISSEC).

### **Dr. Victor Montori**

Knowledge and Evaluation Research (KER) Unit.  
Mayo Clinic - Minnesota, USA.

### **Dra. Montserrat Rué**

Institut de Recerca Biomèdica de Lleida (IRBLLEIDA).  
Departament de Ciències Mèdiques Bàsiques.  
Universitat de Lleida, España.

## DISEÑO

Miquel A. Fernández  
[www.mafsdisseny.com](http://www.mafsdisseny.com)

## FINANCIACIÓN

- The European Regional Development Fund (ERDF). European Union's Horizon 2020 research and innovation programme under the Marie Skłodowska-Curie grant agreement No. 713679 from the Universitat Rovira i Virgili (URV).
- Proyecto PI18/00773 "La colaboración de los profesionales sanitarios para incluir la toma de decisiones compartida en el programa de cribado de cáncer de mama" financiado por el Instituto de Salud Carlos III y cofinanciado por la Unión Europea (FEDER) "Una manera de hacer Europa".



## ÍNDICE

|                                                                            |           |
|----------------------------------------------------------------------------|-----------|
| OBJETIVO DEL MANUAL                                                        | 6         |
| ¿A QUIÉN VA DIRIGIDO?                                                      | 6         |
| <b>Introducción</b>                                                        | <b>7</b>  |
| <b>Toma de decisiones compartida</b>                                       | <b>13</b> |
| 1. ¿Qué es?                                                                | 14        |
| 2. ¿Por qué es importante?                                                 | 17        |
| 3. ¿Qué habilidades o competencias necesitan los profesionales sanitarios? | 19        |
| 4. ¿Qué opinan los pacientes?                                              | 22        |
| <b>La toma de decisiones compartida en el cribado de cáncer de mama</b>    | <b>25</b> |
| 1. El Programa de cribado                                                  | 26        |
| 2. Implementación de la TDC en cribado de cáncer de mama                   | 31        |
| 3. Autoevaluación del proceso de TDC                                       | 40        |
| <b>Referencias bibliográficas</b>                                          | <b>45</b> |

## OBJETIVO DEL MANUAL

Este manual pretende ser un documento de referencia que sirva de guía para el desarrollo e implementación de la **Toma de Decisiones Compartida (TDC)** en el cribado del cáncer de mama.

## ¿A QUIÉN VA DIRIGIDO?

A profesionales sanitarios de la comunidad autónoma de Catalunya relacionados con el cribado de cáncer de mama y que tengan contacto directo con las mujeres que deben participar en el programa.



# Introducción

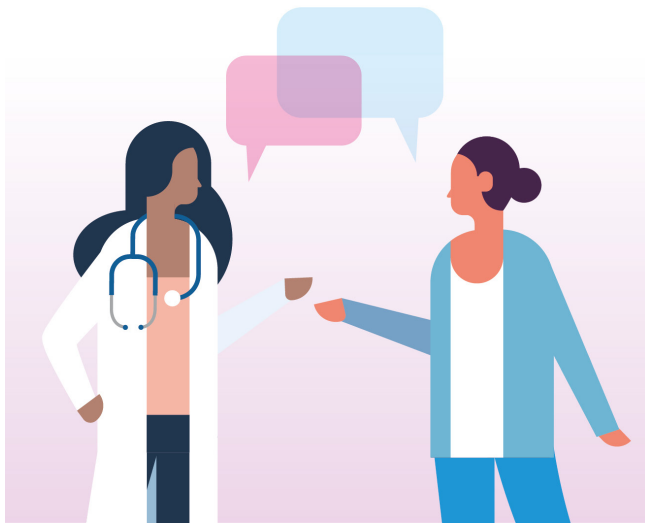

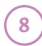

El objetivo del **cribado de cáncer de mama** es detectar tempranamente el tumor, en una fase preclínica. Esto permite mejorar las opciones de tratamiento y disminuir la mortalidad<sup>1,2</sup>. A pesar de estos beneficios, el cribado puede producir también efectos adversos: falsos negativos, falsos positivos, sobrediagnóstico y sobretratamiento<sup>2,3,4</sup>. Ante el desconocimiento del grado en que afectará los efectos positivos y negativos a cada mujer en la decisión del cribado, el modelo de **Toma de Decisiones Compartida** (TDC) permite que pacientes y profesionales de la salud disminuyan la incertidumbre de la decisión<sup>3,5,6</sup>.

La TDC ha sido utilizada principalmente en los países occidentales para mejorar las decisiones en salud<sup>7</sup>. Así, en 2012 The European Patients' Forum inició la campaña “*nothing about me, without me*” (nada sobre mí, sin mí)<sup>8</sup> para involucrar a las personas en las decisiones sobre su salud<sup>9</sup>.

Por otro lado, la **Medicina Personalizada** (MP) se ha consolidado desde la segunda mitad del siglo XX<sup>10,11,12</sup>, centrando la atención sanitaria en la combi-

nación de la información clínica, genética y ambiental de cada persona. Al individualizar la atención, los profesionales sanitarios acceden a un enfoque integrado y basado en la evidencia para la medición de riesgo, diagnósticos, aplicación de terapias farmacológicas y manejo clínico. Estas medidas han permitido optimizar la atención clínica según las características de cada individuo<sup>13</sup>.

La MP es un modelo de salud que está tomando cada vez más relevancia en las estrategias sanitarias en Europa, por lo que prepararse para su implementación forma parte de los desafíos actuales.

La MP se complementa con la TDC ya que ambos modelos buscan posicionar a la persona en el centro de la atención, mejorar su participación en las decisiones de salud y priorizar un enfoque de atención preventiva sobre la curativa. Es decir, mientras que en la MP se utilizan los antecedentes médicos, ambientales y genéticos para estimar resultados clínicos individuales, en la TDC se consideran los valores, preferencias y vivencias de los pacientes<sup>13</sup>.

La aplicación de la MP en los programas de cribado permite <sup>10-12,14</sup>:

- ✓ Reducir los efectos adversos (falsos positivos, falsos negativos, sobrediagnóstico y sobretratamiento).
- ✓ Aumentar la eficiencia del cribado en todos los subgrupos de riesgo de cáncer de mama.
- ✓ Ampliar el periodo y la frecuencia del cribado en las mujeres con riesgo elevado de cáncer de mama y reducir la frecuencia en mujeres con bajo riesgo.
- ✓ Informar a las mujeres sobre la detección precoz para que las decisiones que adopten estén mejor sustentadas.
- ✓ Ajustar la percepción del riesgo de padecer un cáncer de mama al riesgo real.

En este contexto, algunas investigaciones han explorado cómo se desarrolla la TDC. Martínez, et al. (2018)<sup>15</sup> identificaron que el 83% de los profesionales creían que las decisiones de detección deberían ser compartidas o centradas en el paciente. Sin embargo, el 77% dedicó menos de 5 minutos para discutir con ellos los beneficios y los riesgos relacionados con la mamografía<sup>16</sup>. Por otro lado, en España solo el 24% de los pacientes afirma haber tomado la decisión conjunta con su profesional sanitario teniendo en cuenta sus características y preferencias personales y sociales<sup>17</sup>. Esto evidencia la falta de estrategias para involucrar a las personas en su salud, posibles deficiencias en las habilidades comunicativas y la inexistencia de vías de diálogo productivas entre los distintos actores del encuentro clínico del cribado de mama<sup>18</sup>.

En este sentido, la literatura ha reportado algunas barreras para la implementación de la TDC<sup>19</sup>: falta de tiempo en los encuentros clínicos, falta de conocimientos del profesional sanitario acerca del modelo TDC y de los efectos adversos del cribado, así como la dificultad de los pacientes para tener

una actuación proactiva<sup>20,21</sup>. La **Agencia de Calidad y Evaluación Sanitarias de Cataluña** (AQuAs) describe las Herramienta de Ayuda a la Toma de Decisiones (HATD) como un elemento central para la TDC, aunque actualmente no dispone de una para el cribado de cáncer de mama<sup>22</sup>. Un estudio reciente desarrolló una HATD en el cribado de cáncer de mama (anexo 1). Su evaluación posterior puso de manifiesto que los profesionales sanitarios y las mujeres valoraron positivamente el intercambio de información equilibrada del cribado mediante una HATD con el fin de mejorar la toma de decisiones en salud<sup>23</sup>.

Sin embargo, a pesar de que en la actualidad ha habido un incremento de materiales destinados a las pacientes<sup>24</sup>, son escasos aquellos que ayudan a los profesionales para incorporar las preferencias y los valores de las personas en la toma de decisiones en salud. En este sentido, **este documento y sus anexos ofrece a los profesionales sanitarios evidencias científicas sobre la TDC para que sea aplicable al proceso de cribado de cáncer de mama.**

# Toma de decisiones compartida

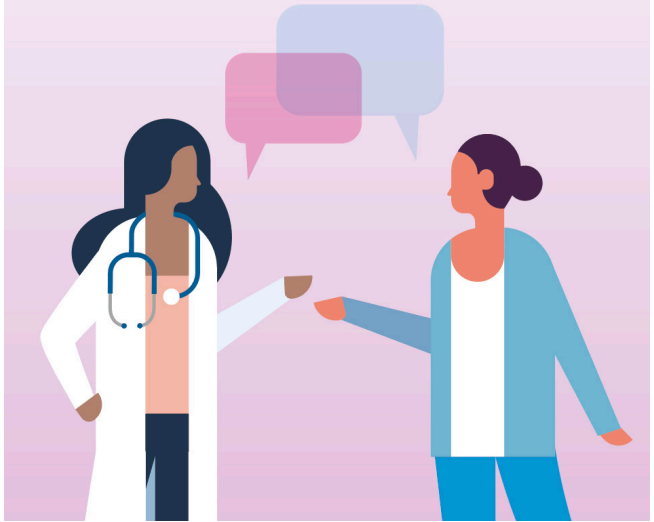

## 1. ¿Qué es?

La Toma de Decisiones Compartida (TDC) surge en la década de los 60-70 desarrollándose en mayor medida a partir de los 90. Corresponde a un modelo de atención participativa ubicada entre el estilo de atención paternalista y el informativo<sup>25,26</sup>.

Figura 1: Modelos de atención en salud

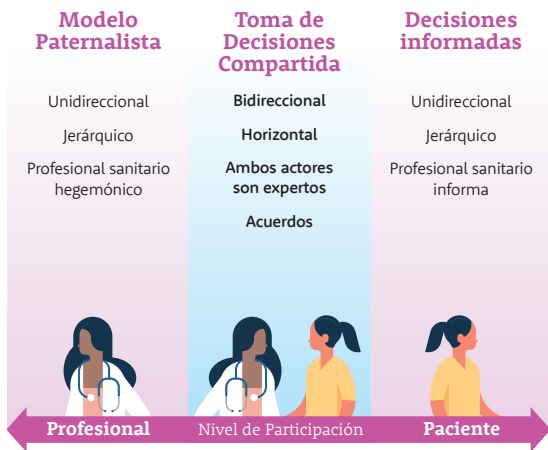

Fuente: Elaboración propia del grupo ProShare



La TDC fomenta la participación del paciente<sup>27</sup> para tomar una decisión conjunta con el profesional sanitario en relación con cambios en el estilo de vida, pruebas diagnósticas, tratamientos y acciones terapéuticas donde pueda existir algún grado de incertidumbre<sup>28,29</sup>. La TDC se desarrolla durante el encuentro clínico y ambos actores son considerados expertos: el paciente en su situación de salud, valores, creencias y preferencias; y el profesional sanitario en la evidencia científica e información de las opciones terapéuticas disponibles<sup>30</sup>.

Figura 2: Rol de los participantes en el encuentro clínico

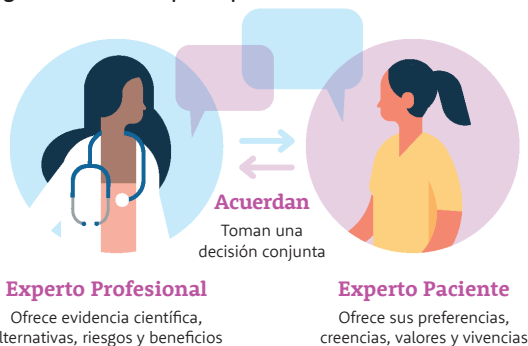

Fuente: Elaboración propia del grupo ProShare

Por tanto, el objetivo de la TDC se centra en garantizar que las personas tomen decisiones sobre su salud cuando están suficientemente informadas<sup>31</sup>. Para lograrlo se requiere de una negociación continua mediante la discusión entre ambos expertos (paciente y profesional) centrando el diálogo en los valores, preferencias, circunstancias del paciente, así como en los beneficios, daños, riesgos y opciones terapéuticas ofrecidas por el profesional sanitario. Como resultado final de esta discusión se consigue que las personas sean más autónomas y presenten un mayor nivel de compromiso y responsabilidad en su salud<sup>(30,32-34)</sup>.

**Figura 3: Elementos de la Toma de Decisiones Compartida**

|                                                                                   |                                                     |                                                 |
|-----------------------------------------------------------------------------------|-----------------------------------------------------|-------------------------------------------------|
| <p>A) Intercambio de información entre el paciente y el profesional sanitario</p> | <p>B) Deliberación sobre las distintas opciones</p> | <p><b>C) Tomar una decisión consensuada</b></p> |
|-----------------------------------------------------------------------------------|-----------------------------------------------------|-------------------------------------------------|

Fuente: Adaptación de Elwyn et al. 2012<sup>30</sup>

## 2. ¿Por qué es importante?

La TDC se sustenta en el principio de autonomía de los pacientes. La Ley 21/2000 Derechos de Información relativos a la Salud, Autonomía del Paciente y Documentación Clínica protege su derecho a decidir libremente después de recibir la información adecuada entre las opciones clínicas disponibles<sup>35</sup>. Por tanto, los profesionales están sujetos jurídicamente al cumplimiento de este principio, que no puede limitarse al deseo o voluntariedad del profesional.

Asimismo, en Cataluña, el **Modelo Asistencial del Instituto Catalán de Oncología 2019-2022** promueve intervenciones centradas en la persona, teniendo como primer objetivo considerar las necesidades de las personas, para luego planificar el cuidado y atención en salud<sup>36</sup>.

Junto con lo anterior, la implementación de la TDC ha evidenciado una serie de beneficios en los pacientes, en los profesionales y también en los sistemas sanitarios<sup>8, 17, 34, 37, 38</sup>.

- ✓ Aumenta la participación de los pacientes.
- ✓ Mejora la comunicación paciente-profesional sanitario.
- ✓ Mayor adherencia a tratamientos.
- ✓ Mejora los resultados biométricos en salud.
- ✓ Aumenta la satisfacción de los pacientes en la atención de salud.
- ✓ Disminuye la preocupación y la ansiedad en los pacientes.
- ✓ Reduce el conflicto decisional de los pacientes cuando se enfrentan a tomar una decisión diagnóstica y/o terapéutica.
- ✓ Mejora el conocimiento de la enfermedad, las opciones diagnósticas y terapéuticas en los pacientes.
- ✓ Aumenta la precisión en la percepción del riesgo.
- ✓ Aumenta la elección de opciones más beneficiosas.
- ✓ Reduce el uso de tratamientos muy invasivos y costosos.
- ✓ Reduce la variabilidad injustificada en la práctica asistencial.
- ✓ Contribuye a la racionalización del uso de recursos del sistema sanitario.

### 3. ¿Qué habilidades o competencias necesitan los profesionales sanitarios?

Comunicar de forma equilibrada los riesgos y beneficios de cualquier opción terapéutica no es tarea fácil, pero es necesario ayudar a los pacientes a estar mejor informados<sup>37</sup>; para conseguirlo se han identificado dos tipos de competencias que deben desarrollar los profesionales sanitarios para aplicarlas en la TDC<sup>39</sup>:

#### 3.1 Competencias relacionales

Son las habilidades que favorecen una buena comunicación durante el encuentro clínico y proporcionan un ambiente cómodo que permite al paciente compartir sus preocupaciones. Para lograrlo el profesional debe tener un interés genuino en querer involucrarse y comprender el punto de vista del usuario y utilizar el tipo de lenguaje más adecuado.

Entre las competencias del profesional destacan:

- ✓ Realizar una escucha activa.
- ✓ Respetar las decisiones tomadas por el paciente.
- ✓ Realizar preguntas abiertas.
- ✓ Generar en todo momento contacto visual.
- ✓ Dejar que los tiempos sean pautados por el paciente.
- ✓ Reconocer sus señales emocionales o verbales.
- ✓ Usar habilidades comunicacionales: el resumen, la clarificación, el reflejo, la empatía, entre otras <sup>40</sup>.

### 3.2 Competencias de comunicación de riesgo

Son las habilidades de los profesionales sanitarios que sirven para discutir con el paciente la incertidumbre que existe sobre las opciones terapéuticas y comunicar de forma efectiva los riesgos y beneficios de las diferentes opciones. Se debe evaluar la evidencia en relación con cada contexto en particular, es decir, considerar los antecedentes personales: historia familiar, historia clínica y factores de riesgo o protectores que podrían aumentar o disminuir los beneficios/daños de algunas opciones <sup>39</sup>.

Para esto se recomienda evitar el lenguaje técnico, adaptar la cantidad de información a las necesidades actuales del paciente, utilizar diagramas, comprobar la comprensión de la información ofrecida, incorporar valores del paciente a la evidencia, transmitir información objetiva, facilitar la participación y evaluar la información de la que ya dispone el paciente <sup>41</sup>.

Como resumen, las habilidades comunicativas necesarias para poseer una óptima relación con el paciente se pueden resumir en cinco categorías <sup>40</sup> (Figura 4).

**Figura 4: Habilidades comunicativas**

| Escucha                  | Lenguaje                                                                                                                                 | No verbal                                                                                                                      | Cultural                                             | Actitudinal                                              |
|--------------------------|------------------------------------------------------------------------------------------------------------------------------------------|--------------------------------------------------------------------------------------------------------------------------------|------------------------------------------------------|----------------------------------------------------------|
| Escucha general y activa | <p><b>Verbal:</b> tono apropiado y adaptado al nivel educativo</p> <p><b>Escrita:</b> comunicación clara y uso de material educativo</p> | <p><b>Expresivo:</b> lenguaje corporal y contacto visual</p> <p><b>Receptivo:</b> responde a lenguaje corporal y emociones</p> | Adaptar comunicación a la cultura, edad y enfermedad | Respetar las opiniones y derecho de decidir del paciente |

Fuente: Adaptación de Laughlin T, Wetmore S, Allen T, Brailovsky C, Crichton T, Bethune C, Donoff M, Lawrence K. 2012<sup>40</sup>.

## 4. ¿Qué opinan los pacientes?

En un estudio desarrollado en España el 2012, usuarios de Atención Primaria con distintas patologías, valoraron una serie de elementos como positivos en la atención clínica: entrega de información, comunicación de los efectos adversos y beneficios, recomendaciones por parte del profesional, posibilidad de participar activamente en la decisión y la percepción de habilidades comunicativas básicas de los profesionales sanitarios.

En este mismo estudio se identificó que al 60% de los pacientes les hubiese gustado que el profesional sanitario les pidiese su opinión, aunque no se les animó a hacerlo. Además, la mayoría hubieran deseado recibir más información de la que se les entregó<sup>42</sup>. En relación con la entrega de información, estudios internacionales sobre cribado de cáncer de mama han demostrado que solo entre un 8% a 10% de las mujeres recibieron información respecto al sobrediagnóstico<sup>43</sup>.

Los pacientes sienten mayor tranquilidad, se fortalece la relación profesional sanitario-paciente



y la alianza terapéutica al participar activamente en las decisiones de su salud, ya que aumentan sus conocimientos, disminuye la incertidumbre y aumenta la posibilidad de manejar mejor su enfermedad. Además, las personas consideran que el profesional sanitario debe involucrarse en las decisiones de sus pacientes, es decir, no abandonarlos en el proceso de decisión, presentarles las opciones disponibles y brindarles asesoramiento, a pesar de que la última decisión sea la del paciente<sup>44</sup>.

En 2013, otro estudio determinó cuáles son los elementos que más valoran los pacientes en la TDC, siendo los más significativos el rol comunicativo del profesional sanitario, la percepción de una escucha comprensiva, la sensación de una preocupación real por su salud y por sus necesidades, una conversación acorde al contexto y la constatación de un dominio de la información<sup>45</sup>. Finalmente, la evidencia también concluye que aún falta un largo camino de empoderamiento por el cual las personas fortalezcan su capacidad de ejercer autonomía en el autocuidado de su salud<sup>42</sup>.



# La toma de decisiones compartida en el cribado de cáncer de mama

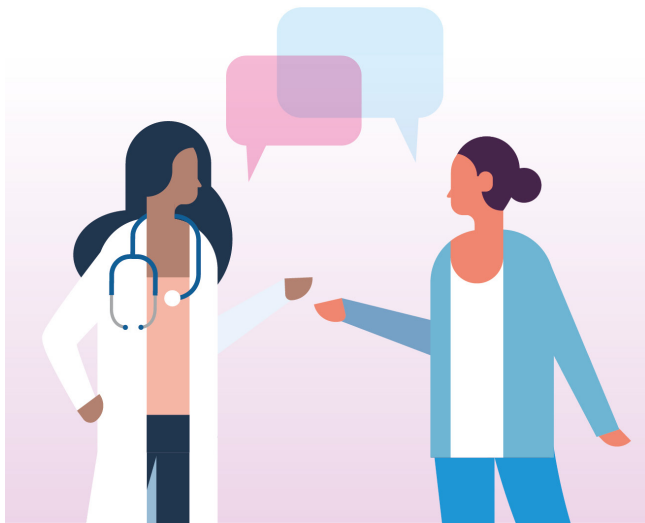

# 1. El Programa de cribado

## 1.1 Cribado poblacional en Cataluña

Manual de apoyo para  
implementación de la TDC

26

El Plan Estratégico del *Pla Director d'Oncologia* de la Generalitat de Catalunya menciona como objetivo disminuir el impacto del cáncer de mama en la población mediante el cribado<sup>46</sup>. Sin embargo, no se hace referencia a la forma de incorporar a la mujer en las decisiones de su salud, a pesar de que su participación es uno de los pilares del Plan de Salud de Cataluña 2016-2020<sup>47</sup>.

Actualmente, cada Programa dependiente del *Pla Director d'Oncologia* realiza, cada dos años y en base al Registro Central de Asegurados (RCA), la captación de las mujeres entre los 50 y los 69 años mediante una carta dirigida a su domicilio particular. En ella, se las invita a realizar, de forma gratuita, una mamografía en un centro de salud previamente asignado<sup>48</sup>. Este mecanismo no incorpora un espacio de contacto entre el profesional sanitario y la mujer, en el que ella pueda resolver sus dudas o inquietudes, ni permite

Figura 5: Flujograma del programa de Detección Precoz del Cáncer de Mama

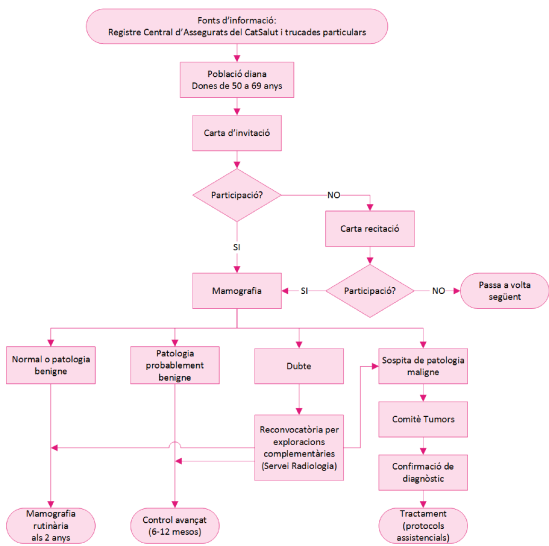

Fuente: Elaborado por Servicio de Epidemiología y Prevención del cáncer (SEPC)<sup>49</sup>.

ofrecerle información suficiente para hacerla participe en la decisión sobre su participación -o no- en el programa de cribado.

Para subsanar esta falta de contacto **se requiere un cambio en la organización y en los medios de información a las mujeres**<sup>49</sup>. Así, el uso de Herramientas de Ayuda a la Toma de Decisiones (HATD) ha demostrado ser un apoyo para el profesional sanitario y para las mujeres en el momento de tomar una decisión conjunta respecto al cribado.

## 1.2 ¿Por qué aplicar la TDC al cribado de cáncer de mama?

Las pruebas diagnósticas para la detección precoz del cáncer de mama han tomado fuerza como estándar de salud pública al reconocerse, tanto por la comunidad científica como por **las mujeres, su influencia sobre la reducción de la mortalidad en un 20%**<sup>50</sup> y un incremento de la supervivencia al cáncer de mama que alcanza el 80% a los cinco años<sup>24</sup>. Sin embargo, estudios recientes demues-

tran que existe una escasa o nula percepción de sus daños o efectos adversos<sup>27</sup>. Resultados, que al menos vienen condicionados por la sensibilidad de la prueba, que pueden variar entre un 61% y el 95%, y su especificidad que varía entre el 80% al 90%<sup>42,51</sup>.

Los principales riesgos atribuidos al cribado de cáncer de mama son los falsos positivos, falsos negativos y el sobrediagnóstico<sup>29</sup>. Este último concepto se define como aquellos tumores que crecen tan lentamente que nunca llegarían a ser un problema de salud e incluso desaparecerían de forma espontánea, sin necesidad de tratamiento. Actualmente, se desconoce qué tipo de lesiones progresarán y cuáles no, por tanto, se ofrece tratamiento a todas las mujeres diagnosticadas de cáncer de mama (lo que se conoce como sobretreatmento)<sup>23</sup> que provoca una sensación de fragilidad y vulnerabilidad en la mujer, intolerancia a la incertidumbre, grados de estrés en áreas personal-social-familiar-laboral, vinculación a procedimientos de mayor riesgo, como es el caso de las biopsias<sup>52</sup> y, finalmente, un aumento del gasto

sanitario<sup>8</sup>. Ante la incertidumbre entre los beneficios y efectos adversos en el cribado de cáncer de mama, se recomienda el uso de TDC con el fin de definir en base a la evidencia científica actual y los valores de las mujeres la decisión de participar o no en el cribado.

La información referente al cribado de cáncer de mama se encuentra resumida en la HATD elaborada el año 2016 (anexo 1). Allí se presenta información obtenida del *United Kingdom National Health Service (NHS)*, respecto a definiciones, incidencia, estadísticas de riesgo, beneficios y efectos adversos de una forma sencilla de comprender para el profesional sanitario y la mujer.



## 2. Implementación de la TDC en cribado de cáncer de mama

Antes de iniciar el proceso de TDC es importante construir un ambiente que permita una conversación cercana entre el profesional sanitario y la mujer. En este sentido, se debe establecer una relación de confianza basada en la empatía, para facilitar una comunicación fluida y de calidad<sup>33,53</sup>. El proceso debe ser deliberativo<sup>31</sup>, es decir, las mujeres en el cribado de cáncer de mama toman conciencia de que pueden tomar una decisión, lo cual puede requerir más de un encuentro clínico<sup>54</sup>. Además este proceso debe ser dinámico ya que las fases deben adaptarse a las necesidades, inquietudes y prioridades de cada mujer<sup>55</sup>.

Una vez proporcionada la información, se debe explorar explícitamente si la mujer desea desempeñar un rol activo o pasivo en la decisión<sup>33,56</sup> ya que si no se hace de esta forma puede inducir a un rol pasivo en las mujeres<sup>27,33,56</sup>. Sin embargo, no es impedimento para corroborar durante todo el encuentro clínico el rol que desean desempeñar, ya que éste

puede cambiar de uno activo a uno pasivo o viceversa en el transcurso de la conversación. Además, se debe considerar que existen factores que pueden aumentar o disminuir la participación de las mujeres<sup>33</sup>. Algunos factores, entre otros, que promueven su participación son la motivación de los profesionales de la salud para involucrar a la persona en sus decisiones, la percepción de que la TDC producirá un impacto positivo en el proceso clínico, la alta alfabetización de la mujer<sup>57,58</sup> o el propio deseo de ella de ser parte activa en las decisiones que afectan a su salud<sup>37,57,59-61</sup>. Sin embargo, la falta del tiempo en el encuentro clínico, la edad avanzada de las mujeres, personas inmigrantes y/o con dificultad de comunicarse en el idioma del profesional, el bajo nivel socioeconómico de las mujeres, su baja alfabetización<sup>33,37,56</sup> y la presencia de patologías de salud mental<sup>33,52</sup> limitan la TDC.

## 2.1 Fases y modelo “The three-talk”

Las tres fases que componen este modelo son<sup>62</sup>:

### FASE 1 Crear equipo

El principal objetivo de esta fase es comunicar la necesidad de tomar una decisión en equipo, cuyos integrantes son el profesional sanitario y la mujer. **Aquí se comunican los objetivos de la decisión, por qué se debe tomar (presencia de factores de riesgo personal) y las alternativas disponibles basadas en la evidencia que se deberán tener en cuenta.** El profesional debe enfatizar en que (a) la mujer puede decidir no tomar una decisión en ese momento y solicitar el apoyo de otros actores como familiares u otros especialistas y (b) debe ser receptivo a las reacciones que puede generar en la mujer el enfrentarse a esta decisión. Por tanto, debe recalcar que la acompañará en el proceso hasta que se sienta segura para llevar a cabo la decisión.

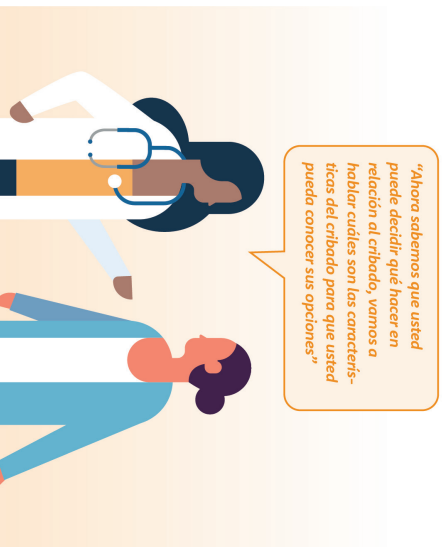

Figura 6: Crear equipo

## FASE 2

### Plantear las opciones

El principal objetivo de esta fase es informar claramente, y según las características de cada mujer, sobre los efectos adversos y beneficios del cribado. Para esto **debe explorar sus preferencias iniciales** (prioridades basadas en los conocimientos preexistentes o ideas preconcebidas respecto al cribado<sup>31</sup>), **sus valores, sus preocupaciones y expectativas y ampliar en detalle las opciones, considerando riesgos y beneficios.** De esta forma, las preferencias iniciales pasarán a ser preferencias informadas (preferencias personales basadas en los valores una vez que se ha asegurado la comprensión de los riesgos y beneficios más relevantes del cribado<sup>31</sup>).

**Para explicar los riesgos específicos se recomienda utilizar alguna HATD (anexo 1), ya que mejorarán la comprensión de la información incluso en mujeres con baja alfabetización**<sup>23</sup>. En el contexto general, existen dos grandes categorías de HATD; las que se utilizan durante el encuentro clínico de forma con-

junta profesional sanitario-mujer suelen ser concisas, como los folletos (la que se proporciona en este manual). Las más extensas pueden ser utilizadas antes o después del encuentro clínico, como por ejemplo los documentos, páginas web, etc.<sup>31</sup>

Figura 7: Plantear las opciones

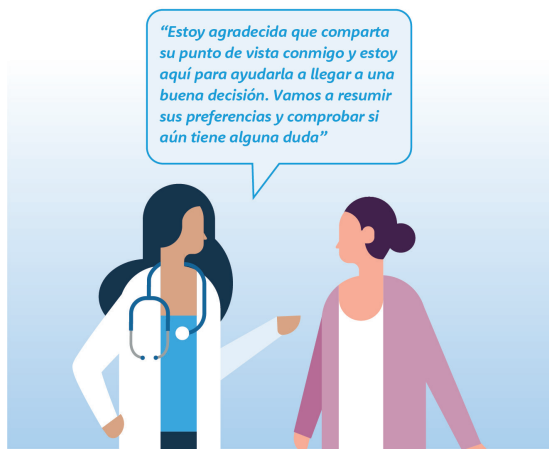

### FASE 3

#### Tomar una decisión compartida

En esta fase se argumentan las alternativas y se toma una decisión respecto a la participación en el cribado de cáncer de mama<sup>62</sup>. El profesional debe reforzar la idea de acompañamiento en la decisión. Además, debe dar el tiempo suficiente que permita a la mujer reflexionar en torno a sus prioridades, incluso incluyendo la idea de diferirla para otro momento o delegarla en el profesional; en este último caso se recomienda identificar los elementos que le impiden hacerlo por ella misma. Finalmente, debe confirmar la decisión y acordar un plan de acción<sup>33,56</sup> y seguimiento que permita un circuito de retroalimentación entre el profesional y la mujer<sup>55,56</sup>.

38

Manual de apoyo para  
implementación de la TDC

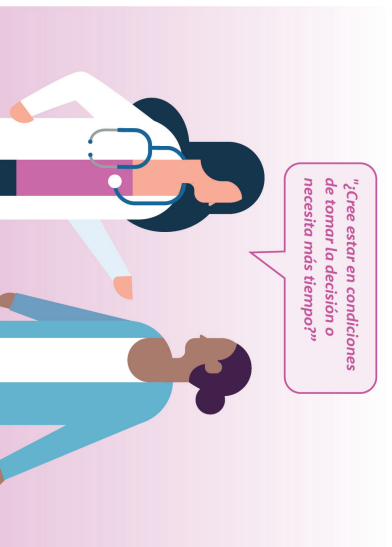

Figura 8: Tomar una decisión informada



Figura 9: Fases de la Toma de Decisiones Compartida

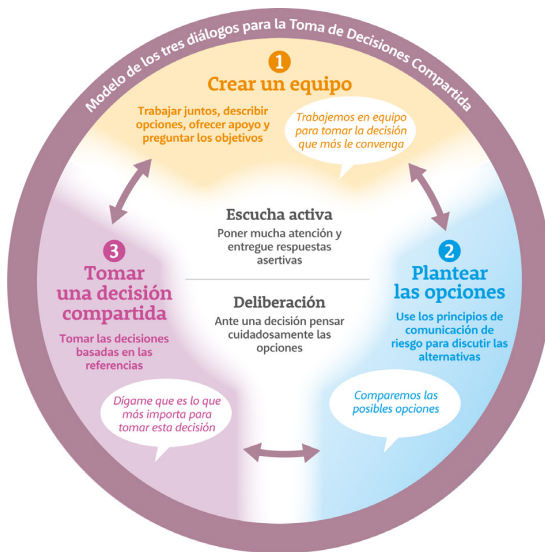

Fuente: Adaptación de Three-talk model of shared decision making. Elwyn G, et al 2017. Uso autorizado por autor<sup>62</sup>.

### 3. Autoevaluación del proceso de TDC

El instrumento SDM-Q-doc<sup>63</sup> es una encuesta de autoevaluación para profesionales sanitarios que permite medir el nivel de participación que se le ha ofrecido a la mujer para tomar decisiones. Este instrumento está compuesto por nueve ítems que deben ser valorados por el profesional dentro de seis alternativas; desde totalmente en desacuerdo (valor 1) a totalmente de acuerdo (valor 6).

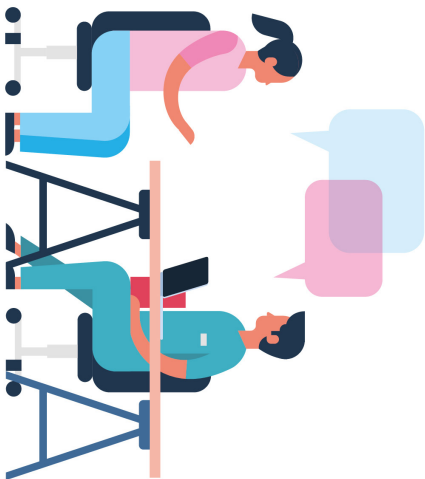

| Criterio                                                                                                                   | Puntos*                  |                          |                          |                          |                          |                          |
|----------------------------------------------------------------------------------------------------------------------------|--------------------------|--------------------------|--------------------------|--------------------------|--------------------------|--------------------------|
|                                                                                                                            | 1                        | 2                        | 3                        | 4                        | 5                        | 6                        |
| Informé claramente a la mujer de la necesidad de tomar una decisión sobre su participación en el cribado de cáncer de mama | <input type="checkbox"/> | <input type="checkbox"/> | <input type="checkbox"/> | <input type="checkbox"/> | <input type="checkbox"/> | <input type="checkbox"/> |
| Pregunté a la mujer de forma precisa cómo le gustaría participar en la toma de decisiones                                  | <input type="checkbox"/> | <input type="checkbox"/> | <input type="checkbox"/> | <input type="checkbox"/> | <input type="checkbox"/> | <input type="checkbox"/> |
| Informé a la mujer que existe la opción de participar o no en el cribado                                                   | <input type="checkbox"/> | <input type="checkbox"/> | <input type="checkbox"/> | <input type="checkbox"/> | <input type="checkbox"/> | <input type="checkbox"/> |
| Explicué claramente a la mujer las ventajas y desventajas de cada opción                                                   | <input type="checkbox"/> | <input type="checkbox"/> | <input type="checkbox"/> | <input type="checkbox"/> | <input type="checkbox"/> | <input type="checkbox"/> |
| Ayudé a la mujer a entender toda la información sobre beneficios y efectos adversos                                        | <input type="checkbox"/> | <input type="checkbox"/> | <input type="checkbox"/> | <input type="checkbox"/> | <input type="checkbox"/> | <input type="checkbox"/> |
| Pregunté a la mujer qué opción prefería                                                                                    | <input type="checkbox"/> | <input type="checkbox"/> | <input type="checkbox"/> | <input type="checkbox"/> | <input type="checkbox"/> | <input type="checkbox"/> |
| La mujer y yo hemos valorado ampliamente todas las opciones                                                                | <input type="checkbox"/> | <input type="checkbox"/> | <input type="checkbox"/> | <input type="checkbox"/> | <input type="checkbox"/> | <input type="checkbox"/> |
| La mujer y yo hemos escogido conjuntamente una opción                                                                      | <input type="checkbox"/> | <input type="checkbox"/> | <input type="checkbox"/> | <input type="checkbox"/> | <input type="checkbox"/> | <input type="checkbox"/> |
| La mujer y yo nos hemos puesto de acuerdo sobre el seguimiento de su atención sanitaria posterior                          | <input type="checkbox"/> | <input type="checkbox"/> | <input type="checkbox"/> | <input type="checkbox"/> | <input type="checkbox"/> | <input type="checkbox"/> |

\* La puntuación va de: "Totalmente en desacuerdo" (1) a "Totalmente de acuerdo" (6)

Fuente: *SDM-Q-doc adaptado al cribado de cáncer de mama.*

## Procedimiento y Resultados de la autoevaluación

Para conocer el resultado se deben sumar los puntos obtenidos en cada sección, identificando así las fases del modelo “*The three-talk*”.

| Fase de la TDC                          | Puntos                   | Interpretación                                                                                                                                                                                      |
|-----------------------------------------|--------------------------|-----------------------------------------------------------------------------------------------------------------------------------------------------------------------------------------------------|
| Fase 1<br>“ <b>Crear equipo</b> ”       | <input type="checkbox"/> | 13 a 18 puntos:<br>adherente a la TDC<br>3 a 12 puntos:<br>sin adherencia a la TDC                                                                                                                  |
| Fase 2<br>“ <b>Plantear opciones</b> ”  | <input type="checkbox"/> | 13 a 18 puntos:<br>adherente a la TDC<br>3 a 12 puntos:<br>sin adherencia a la TDC                                                                                                                  |
| Fase 3<br>“ <b>Tomar una decisión</b> ” | <input type="checkbox"/> | 13 a 18 puntos:<br>adherente a la TDC<br>3 a 12 puntos:<br>sin adherencia a la TDC                                                                                                                  |
| <b>Puntuación total:</b>                | <input type="checkbox"/> | <b>46 a 54:</b><br>Fuerte adherencia a favor de la TDC<br><b>37 a 45:</b><br>Leve adherencia a la TDC<br><b>28 a 36:</b><br>Indiferencia a la TDC<br><b>9 a 27:</b><br>Falta de adherencia a la TDC |

La interpretación y puntos de corte se basaron en la evidencia de Pollard, Bansback and Bryan (2015)<sup>64</sup>. Se dividieron los puntos totales (54 puntos) según los porcentajes de corte descritos; >80% “Fuerte adherencia del profesional a favor de la TDC”; 60-80% “Leve adherencia del profesional a la TDC”; 40-60% “Indiferencia del profesional a la TDC” y <40% “Falta de adherencia del profesional a la TDC”. Por otro lado, los puntos de corte por cada fase definen como “adherente” aquellos superiores al 60% y “sin adherencia” a la TDC el resto, de un total de 15 puntos (3 al 18). Finalmente, la división por fases corresponde a una adaptación de la escala SDM-Q-doc contrastándola con las características del modelo “*Three-talk*”<sup>61</sup>.

Se recomienda realizar esta autoevaluación con cierta periodicidad ya que permite a los profesionales sanitarios identificar los puntos fuertes y deficientes en cuanto a la forma en que incorporan la participación en salud de las mujeres. De este modo, se facilita focalizar los esfuerzos en mejorar los aspectos más débiles con formación y entrenamiento, y finalmente hacer un seguimiento de los avances conseguidos.

## Referencias bibliográficas

1. Organización Mundial de la Salud. (WHO) Control del cáncer de mama; 2020 [citado 30 de junio de 2020]. Available from: <https://www.who.int/topics/cancer/breastcancer/es/index3.html>
2. Febles G. Revisión de los beneficios del screening del cáncer de mama y análisis de las controversias. *Rev. Imagenol.* [Internet] 2015;19 (1)9-18. Available from: [https://www.webcir.org/revistavirtual/articulos/2016/4\\_noviembre/ur/febles\\_esp.pdf](https://www.webcir.org/revistavirtual/articulos/2016/4_noviembre/ur/febles_esp.pdf)
3. Day N. Overdiagnosis and breast cancer screening. *Breast Cancer Res* [Internet]. 2005;7(5):228-9. Available from: <http://www.ncbi.nlm.nih.gov/pubmed/16168144>
4. Nehmat H. Overdiagnosis of breast cancer in population screening: does it make breast screening worthless? *Cancer Biol Med* [Internet]. 2017;14(1):1-8. Available from: <http://www.cancerbiomed.org/index.php/cocr/article/view/1003>
5. Pollard S, Bansback N, Bryan S. Physician attitudes toward shared decision making: A systematic review. *Patient Educ Couns* [Internet]. 2015; 98(9):1046-57. Available from: <https://www.sciencedirect.com/science/article/abs/pii/S0738399115002256?via%3Dihub>
6. Munthe C, Sandman L, Cutas D. Person Centred Care and Shared Decision Making: Implications for Ethics, Public Health and Research. *Health Care Anal* [Internet]. 2012;20(3):231-49. Available from: <http://link.springer.com/10.1007/s10728-011-0183-y>
7. Barry M, Edgman-Levitan S. Shared Decision Making — The Pinnacle of Patient-Centered Care. *N Engl J Med* [Internet]. 2012;366(9):780-1. Available from: <http://www.nejm.org/doi/10.1056/NEJMp1109283>
8. Coulter A, Collins A. Making shared decision-making a reality. No decision about me, without me [Internet]. The King's Fund. Edwina Rowling, editor. London; 2011. Available from: [www.kingsfund.org.uk](http://www.kingsfund.org.uk)

9. European patients`forum. 150 Million reasons to act; *EPF's Patients' Manifesto for the European Parliament and Commission*. [Internet]. 2009. Available from: [https://www.eu-patient.eu/globalassets/events/old/manifesto/epf\\_manifesto.pdf](https://www.eu-patient.eu/globalassets/events/old/manifesto/epf_manifesto.pdf)
10. Hernández J, Serrano O. La medicina personalizada, la revolución genómica y el Sistema Nacional de Salud. *Rev Cuba Salud Pública* [Internet]. 2014;40(4):379–91. Available from: [http://scielo.sld.cu/scielo.php?pid=S0864-34662014000400012&script=sci\\_arttext&tlng=pt](http://scielo.sld.cu/scielo.php?pid=S0864-34662014000400012&script=sci_arttext&tlng=pt)
11. Chan I, Ginsburg G. Personalized Medicine: Progress and Promise. *Annu Rev Genomics Hum Genet* [Internet]. 2011;12:217–61. Available from: <https://pubmed.ncbi.nlm.nih.gov/21721939/>
12. Medrano-Hernández A. Medicina personalizada: hacia un nuevo modelo en la práctica médica. *Arch Neurocién* [Internet]. 2012;17(2):129–31. Available from: <https://www.medigraphic.com/pdfs/arcneu/ane-2012/ane122h.pdf>
13. Sala M, Domingo L, Rué M, Comas M, Torá-Rocamora I, Macià F, et al. Investigación en cribado de cáncer de mama: camino hacia estrategias personalizadas y decisiones compartidas. *Rev Senol y Patol Mamar* [Internet]. 2014;27(4):176–82. Available from: <https://linkinghub.elsevier.com/retrieve/pii/S0214158214000589>
14. Edwards A, Naik G, Ahmed H, Elwyn G, Pickles T, Hood K, et al. Personalised risk communication for informed decision making about taking screening tests. *Cochrane Database Syst Rev* [Internet]. 2013;28;(2). Available from: <http://doi.wiley.com/10.1002/14651858.CD001865.pub3>
15. Martinez K, Deshpande A, Ruff AL, Bolen S, Teng K, Rothberg M. Are Providers Prepared to Engage Younger Women in Shared Decision-Making for Mammography? *J Womens Health (Larchmt)*. 2018;27(1):24–31. Available from: <http://www.liebertpub.com/doi/10.1089/jwh.2016.6047>
16. Confederación Crohn y Colitis Ulcerosa. Se incumple el modelo de decisiones compartidas con los pacientes [Internet]. Available from: <https://www.accuesp.com/se-incumple-el-modelo-de-decisiones-compartidas-con-los-pacientes>



17. Confederación Crohn y Colitis Ulcerosa. Se incumple el modelo de decisiones compartidas con los pacientes [Internet]. 2020 [citado 30 de junio de 2020]. Available from: <https://accuesp.com/se-incumple-el-modelo-de-decisiones-compartidas-con-los-pacientes>
18. Ministerio de Sanidad, Consumo y Bienestar Social de España. Marco Estratégico para la Atención Primaria y Comunitaria [Internet]. 2019. Available from: [https://www.msbs.gob.es/profesionales/proyectosActividades/docs/Marco\\_Estrategico\\_APS\\_25Abril\\_2019.pdf](https://www.msbs.gob.es/profesionales/proyectosActividades/docs/Marco_Estrategico_APS_25Abril_2019.pdf)
19. Légaré F, Witteman H. Shared decision making: examining key elements and barriers to adoption into routine clinical practice. *Health Aff (Millwood)*. [Internet]. 2013;32(2):276-84 Available from: <https://www.healthaffairs.org/doi/pdf/10.1377/hlthaff.2012.1078>
20. Légaré F, Ratté S, Gravel K, Graham I. Barriers and facilitators to implementing shared decision-making in clinical practice: Update of a systematic review of health professionals' perceptions. *Patient Educ Couns* [Internet]. 2008;73(3):526-35. Available from: <http://www.ncbi.nlm.nih.gov/pubmed/18752915>
21. Hernández-Leal MJ, Pérez-Lacasta M, Feijoo-Cid M, Ramos-García V, Carles-Lavila M. Healthcare professionals' behaviour to implement in shared decision making in screening programs: A systematic review. *Patient Educ Couns*. forthcoming. 2020.
22. Agencia de Calidad y Evaluación Sanitarias de Cataluña (AQuAs). Estado de situación de las herramientas de ayuda a la toma de decisiones clínicas en Cataluña. [Internet]. 2020 [citado 30 de junio de 2020]. Available from: [http://aquas.gencat.cat/ca/ambits/avaluacio-tecnologies-qualitat/guies/eines\\_ajut\\_presa\\_decisions\\_catalunya/](http://aquas.gencat.cat/ca/ambits/avaluacio-tecnologies-qualitat/guies/eines_ajut_presa_decisions_catalunya/)
23. Toledo-Chavarri A, Rué M, Codern-Bove N, Carles-Lavila M, Perestelo-Perez L, Perez-Lacasta MJ, and Feijoo-Cid M. A Qualitative Study on a Decision Aid for Breast Cancer Screening: Views from Women and Health Professionals. *Eur J Cancer Care (Engl)* [Internet]. 2017. 26(3). Available from: <https://onlinelibrary.wiley.com/doi/abs/10.1111/ecc.12660>

24. Grupo Español de Investigación en Cáncer de Mama. Guía GEICAM de Práctica Clínica: Para el Diagnóstico y Tratamiento del Cáncer de Mama Metastásico. Edición: Comuniland S.L. Madrid; 2015. Available from: [https://portal.guiasalud.es/wp-content/uploads/2019/06/gpc\\_538\\_geicam\\_cancer\\_mama\\_resumida.pdf](https://portal.guiasalud.es/wp-content/uploads/2019/06/gpc_538_geicam_cancer_mama_resumida.pdf)
25. Charles C, Gafni A, Whelan T. Self-reported use of shared decision-making among breast cancer specialists and perceived barriers and facilitators to implementing this approach. *Health Expect* [Internet]. 2004 Dec;7(4):338–48. Available from: <http://www.ncbi.nlm.nih.gov/pubmed/15544686>
26. Barr P, Scholl I, Bravo P, Faber M, Elwyn G, McAllister M. Assessment of Patient Empowerment - A Systematic Review of Measures. *PLoS One* [Internet]. 2015;10(5). Available from: <http://journals.plos.org/plosone/article/file?id=10.1371/journal.pone.0126553&type=printable>
27. Elwyn G, Edwards A, Kinnersley P, Grol R. Shared decision making and the concept of equipoise: the competences of involving patients in health-care choice. *Br J Gen Pract* [Internet]. 2000;50:892–7. Available from: <https://bjgp.org/content/bjgp/50/460/892.full.pdf>
28. Participa y decide sobre tu salud. ¿Qué es la toma de decisiones compartida? [Internet]. 2020 [citado 30 de junio de 2020]. Available from: <https://www.pydesalud.com/toma-de-decisiones-compartidas/>
29. Marmot M, Altman D, Cameron D, Dewar J, Thompson S, Wilcox M. The benefits and harms of breast cancer screening: An independent review. *Br J Cancer* [Internet]. 2013;108(11): 2205–2240. Available from: <https://www.ncbi.nlm.nih.gov/pmc/articles/PMC3693450/>
30. Reyes A. Toma de decisiones compartidas: por una medicina cuidadosa y amable [Internet]. Parte 1. *Por una Medicina Interna de Alto Valor*. 2018. Available from: <https://medicinainternaaltovalor.fesemi.org/el-universo-del-paciente/toma-de-decisiones-compartidas-por-una-medicina-cuidadosa-y-amable-parte-1/>
31. Elwyn G, Frosch D, Thomson R, Joseph-Williams N, Lloyd A, Kinnersley P, et al. Shared decision making: a model for clinical practice. *J Gen Intern Med* [Internet]. 2012;27(10):1361–7. Available from: <http://www.ncbi.nlm.nih.gov/pubmed/22618581>

32. Peralta L, Ruiz J, Castillo R. La participación del paciente en la toma de decisiones en las consultas de atención primaria. *Universidad de Cantabria*. 2010; Available from: <http://www.tesisenred.net/bitstream/handle/10803/10705/TesisLPM.pdf?sequence=1>
33. Información farmacoterapéutica de la Comarca. Participación del paciente en la toma de decisiones. *INFAC* [Internet]. 2014;22(3):12-7. Available from: [https://www.euskadi.eus/contenidos/informacion/cevime\\_infac\\_2014a/es\\_def/adjuntos/INFAC\\_Vol\\_22\\_n\\_3\\_Decisiones\\_compartidas.pdf](https://www.euskadi.eus/contenidos/informacion/cevime_infac_2014a/es_def/adjuntos/INFAC_Vol_22_n_3_Decisiones_compartidas.pdf)
34. Bravo P, Contreras A, Perestelo-Pérez L, Pérez-Ramos J, Málaga G. En busca de una salud más participativa: Compartiendo decisiones de salud. *Rev Peru Med Exp Salud Publica*. 2013;30(4):691-7.
35. Boletín Oficial del Estado. Ley 14/1986 de 2 de febrero, General de Sanidad. BOE de 21/2000. [Internet]. Available from: <https://www.boe.es/boe/dias/2001/02/02/pdfs/A04121-04125.pdf>
36. Instituto Catalán de Oncología. 2019. Plan Estratégico 2019-2022. [Internet]. Available from: <http://ico.gencat.cat/web/.content/minisite/ico/lico/documents/arxius/PLA-ESTRATEGIC-2019-2022-Original.pdf>
37. Gravel K, Légaré F, Graham I. Barriers and facilitators to implementing shared decision-making in clinical practice: a systematic review of health professionals' perceptions. *Implementation Sci*. 2006;1(16). Available from: <http://www.implementationscience.com/content/1/1/16>
38. Légaré F, Ratté S, Stacey D, Kryworuchko J, Gravel K, Graham ID, et al. Interventions for improving the adoption of shared decision making by healthcare professionals. *Cochrane Database of Systematic Reviews* [Internet]. Chichester, UK: John Wiley & Sons, Ltd; 2010. p. CD006732. Available from: <http://www.ncbi.nlm.nih.gov/pubmed/20464744>
39. Légaré F, Moumjid-Ferdjaoui N, Drolet R, Stacey D, Härter M, Bastian H, et al. Core competencies for shared decision making training programs: insights from an international, interdisciplinary working group. *J Contin Educ Health Prof* [Internet]. 2013;33(4):267-73. Available from: <http://www.ncbi.nlm.nih.gov/pubmed/24347105>

40. Ford S, Schofield T, Hope T. What are the ingredients for a successful evidence-based patient choice consultation? A qualitative study. *Soc Sci Med* [Internet]. 2003;56:589–602. Available from: <https://pubmed.ncbi.nlm.nih.gov/12570976/>
41. Laughlin T, Wetmore S, Allen T, et al. Defining competency-based evaluation objectives in family medicine: communication skills. *Can Fam Physician* [Internet]. 2012;58(4):e217–e224. Available from: <https://www.ncbi.nlm.nih.gov/pmc/articles/PMC3325474/>.
42. Ruiz R, Peralta L, Pérula L, Olloqui Mundet J, Carrión T, Sobrino A, et al. Opiniones y percepciones de los pacientes sobre su participación en la toma de decisiones en las consultas de medicina de familia. *Aten Primaria* [Internet]. 2012;44(1):5–10. Available from: <https://www.sciencedirect.com/science/article/pii/S0212656711001545?via%3Dihub>
43. Hersch, J. Jansen & K. McCaffery (2018) Decision-making about mammographic screening: pursuing informed choice, *Climacteric*, 21:3, 209–213, DOI: 10.1080/13697137.2017.1406912
44. Moreau A, Carol L, Dedianne M, Dupraz C, Perdrix C, Lainé X, et al. What perceptions do patients have of decision making (DM)? Toward an integrative patient-centered care model. A qualitative study using focus-group interviews. *Patient Educ Couns* [Internet]. 2012;1;87(2):206–11. Available from: <https://www.sciencedirect.com/science/article/abs/pii/S0738399111004599>
45. Thorne S, Oliffe JL, Stajduhar KI. Communicating shared decision-making: Cancer patient perspectives. *Patient Educ Couns* [Internet]. 2013;90(3):291–6. Available from: <https://www.sciencedirect.com/science/article/abs/pii/S0738399112000912>
46. Generalitat de Catalunya. Departament de Salut. Pla director 2017. [Internet]. Available from: [http://salutweb.gencat.cat/ca/ambits\\_actuacio/linies\\_dactuacio/estrategies\\_salut/cancer/pla\\_director/](http://salutweb.gencat.cat/ca/ambits_actuacio/linies_dactuacio/estrategies_salut/cancer/pla_director/)
47. Generalitat de Catalunya. Departament de Salut. Pla director D'Oncologia 2016–2020: Un sistema centrat en la persona: públic, universal i just. 2016. [Internet]. Available from: [http://salutweb.gencat.cat/web/contenut/departament/pla-de-salut/Pla-de-salut-2016-2020/documents/Pla\\_salut\\_Catalunya\\_2016\\_2020.pdf](http://salutweb.gencat.cat/web/contenut/departament/pla-de-salut/Pla-de-salut-2016-2020/documents/Pla_salut_Catalunya_2016_2020.pdf)

48. Institut Català d'Oncologia. Detecció Precoç de Càncer de Mama. [Internet]. 2020 [citado 30 de junio de 2020]. Available from: <http://ico.gencat.cat/ca/el-cancer/programes-de-deteccio-precoc/programa-de-deteccio-precoc-de-cancer-de-mama/index.html>
49. Servicio de epidemiología y Prevención del cáncer (SEPC). Esquema funcional del Programa de Detección Precoz del Cáncer de Mama. [Internet]. 2020 [citado 30 de junio de 2020]. Available from: <https://epicancer.cat/prevencion-cancer-mama>.
50. Pérez-Lacasta MJ, Martínez-Alonso M, Garcia M, Sala M, Perestelo-Pérez L, Vidal C, Corden-Bové N, Feijoo-Cid M, Toledo-Chávarri A, Cardona Á, Pons A, Carles-Lacastra M, Rué M. Effect of information about the benefits and harms of mammography on women's decision making: The InforMa randomised controlled trial. *Plos One*. [Internet]. 2019; 14(3). Available from: <https://journals.plos.org/plosone/article?id=10.1371/journal.pone.0214057>
51. Álvarez M, Cara M. Radiología básica de mama. Capítulo 1. Introducción al diagnóstico por la imagen de la mama. [Internet] 2015. Available from: [http://www.sedim.es/nueva/wp-content/uploads/2015/01/Cap%C3%ADtulo\\_1\\_Introduccion.pdf](http://www.sedim.es/nueva/wp-content/uploads/2015/01/Cap%C3%ADtulo_1_Introduccion.pdf). Córdoba, España.
52. Coll-Benejam T, Bravo-Toledo R, Marcos-Calvo M, Astier-Peña M. Impacto del sobrediagnóstico y sobretratamiento en el paciente, el sistema sanitario y la Sociedad. *Aten Primaria*. [Internet]. 2018;50(S2):86-95. Available from: <https://www.elsevier.es/es-revista-atencion-primaria-27-articulo-impacto-del-sobrediagnostico-sobretratamiento-el-S0212656718305158>
53. Rowland K, Politi M. Shared Decision-Making and the Patient-Provider Relationship. In: *Handbook of Health Decision Science* [Internet]. New York, NY: Springer New York; 2016. p. 181-92. Available from: [http://link.springer.com/10.1007/978-1-4939-3486-7\\_14](http://link.springer.com/10.1007/978-1-4939-3486-7_14)
54. Elwyn G, Frosch D, Thomson R, Joseph-Williams N, Lloyd A, Kinnerley P, et al. Shared decision making: a model for clinical practice. *J Gen Intern Med* [Internet]. 2012;27(10):1361-7. Available from: <http://www.ncbi.nlm.nih.gov/pubmed/22618581>

55. Elwyn G, Petronella Catharina Anna Vermunt N. Goal-Based Shared Decision-Making: Developing an Integrated Model. *Journal of Patient Experience*. 2019;1-9. Available from: <https://journals.sagepub.com/doi/full/10.1177/2374373519878604>
56. Barani M, Kopitowski K. Toma de decisiones compartidas: centrando los cuidados médicos realmente en nuestros pacientes. *Rev Hosp Ital BAires* [Internet]. 2013;33(2):60-4. Available from: [https://www.hospitalitaliano.org.ar/multimedia/archivos/noticias\\_attachs/47/documentos/14745\\_60-64-HI-33-2-BARANI\\_A.pdf](https://www.hospitalitaliano.org.ar/multimedia/archivos/noticias_attachs/47/documentos/14745_60-64-HI-33-2-BARANI_A.pdf)
57. Guerra C, Jacobs S, Holmes J, Shea J. Are Physicians Discussing Prostate Cancer Screening with Their Patients and Why or Why Not? A Pilot Study. *J Gen Intern Med* [Internet]. 2007;22(7):901-7. Available from: <http://www.ncbi.nlm.nih.gov/pubmed/17549576>
58. Volk R, Linder S, Kallen M, Galliher J, Spano M, Mullen P, et al. Primary care physicians' use of an informed decision-making process for prostate cancer screening. *Ann Fam Med*. [Internet]. 2013;11(1):67-74. Available from: <https://pubmed.ncbi.nlm.nih.gov/23319508/>
59. Malli G. [Early detection of prostate cancer by PSA testing: the results of a qualitative study on barriers caused by physicians in Austria implementing informed decision making]. *Gesundheitswesen* [Internet]. 2013;75(1):22-8. Available from: <https://www.thieme-connect.de/products/ejournals/abstract/10.1055/s-0032-1309017>
60. Davis K, Haisfield L, Dorfman C, Krist A, Taylor KL. Physicians' attitudes about shared decision making for prostate cancer screening. *Fam Med* [Internet]. 2011;43(4):206-6. Available from: <https://pubmed.ncbi.nlm.nih.gov/21499999/>
61. Legaré F, St-Jacques S, Gagnon S, Njoya M, Brisson M, Frémont P, Rousseau F. Prenatal screening for Down syndrome: a survey of willingness in women and family physicians to engage in shared decision-making. *Prenat Diagn* [Internet]. 2011; 31:319-26. Available from: <https://obgyn.onlinelibrary.wiley.com/doi/10.1002/pd.2624>

62. Elwyn G, Duran M, Song J, Aarts J, J Barr P, Berger Z, et al. A three-talk model for shared decision making: multistage consultation process. *BMJ*. 2017;359. [Internet]. Available from: <https://www.bmj.com/content/359/bmj.j4891.long>
63. De las Cuevas C, Perestelo-Perez L, Rivero-Santana A, Cebolla-Martí A, Scholl I, Härter M. Validation of the Spanish version of the 9-item Shared Decision-Making Questionnaire. *Health Expect* [Internet]. 2015;18(6):2143–53. Available from: <https://pubmed.ncbi.nlm.nih.gov/24593044/>
64. Pollard S, Bansback N, Bryan S. Physician attitudes toward shared decision making: A systematic review. *Patient Educ Couns* [Internet]. 2015; 98(9):1046–57. Available from: <https://www.sciencedirect.com/science/article/abs/pii/S0738399115002256?via%3Dihub>

# La participación de los profesionales de la salud en la Toma de Decisiones Compartida en el cribado de cáncer de mama

Manual de apoyo para  
implementación de la Toma de  
Decisiones Compartida

2020

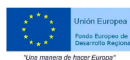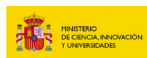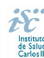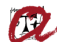

UNIVERSITAT  
ROVIRA I VIRGILI

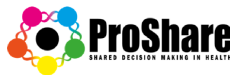

Supplement: bmjopen-2021-052566supp004.pdf [file bmjopen-2021-052566supp004.pdf]
