# Supplementary material for: Development of support material for health professionals who are implementing Shared Decision-making in breast cancer screening: validation using the Delphi technique
Source: PubMed Central journal article supplement (PMC8808455; doi:10.1136/bmjopen-2021-052566), 2022-02-01
Supplement: bmjopen-2021-052566supp005.pdf [file bmjopen-2021-052566supp005.pdf]

# Guía práctica de implementación de la TDC para profesionales sanitarios

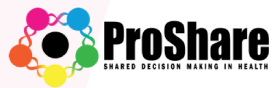

"Ahora sabemos que usted puede decidir qué hacer en relación al cribado, vamos a hablar cuáles son las características del cribado para que usted pueda conocer sus opciones"

## 1 Crear equipo

- Introduzca la posibilidad de tomar decisiones acerca de su salud
- Comente los factores de riesgo y los que le afectan en particular
- Resalte que la acompañará en todo momento y puede contar con el apoyo de familiares u otros profesionales

**Factores de Riesgo** Se estima que 1 de cada 8 mujeres en España padecerán cáncer de mamá a lo largo de su vida. Los factores de riesgo son: edad, antecedentes familiares y personales de cáncer de mama, alteraciones de la mama, hormonal, radioterapia y estilo de vida.

Fuente: AECC: <https://www.aecc.es/es/todo-sobre-cancer/tipos-cancer/cancer-mama/mas-informacion/evolucion-cancer-mama>

"¿Cree estar en condiciones de tomar la decisión o necesita más tiempo?"

## 3 Tomar una decisión

### Tomar una decisión compartida respecto a la mamografía

#### Tomar una decisión compartida respecto a la mamografía

- Dé el tiempo necesario para permitir la reflexión
- Aclare las dudas y valore las preferencias
- Diseñe un plan de seguimiento de la decisión

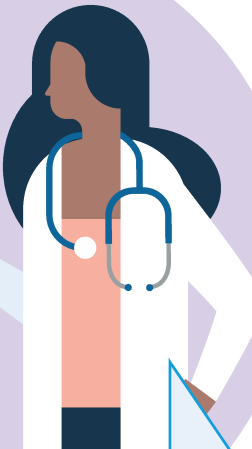

"Estoy agradecida que comparta su punto de vista conmigo y estoy aquí para ayudarla a llegar a una buena decisión. Vamos a resumir sus preferencias y comprobar si aún tiene alguna duda"

## 2 Plantear las opciones

### Informar de la opción de acudir o no a la mamografía

- Explore los conocimientos de la mujer sobre la mamografía
- Introduzca efectos adversos y beneficios de la mamografía a través de una Herramienta de Ayuda a la Toma de Decisiones (HATD)
- Considere las preferencias, creencias, valores y miedos de la mujer sobre la mamografía
- Resuma las opciones y compruebe si la mujer ha comprendido la nueva información

**La mamografía** es utilizada como *gold estándar* para el cribado a nivel internacional; ha demostrado disminuir del 20 al 30% la mortalidad, pero también genera falsos negativos, falsos positivos y sobrediagnóstico; su función es adelantar el diagnóstico sin esperar que aparezcan síntomas de la enfermedad. La mamografía es una radiografía de dos proyecciones (cráneo-caudal y látero-oblicua) en cada pecho que posteriormente se analiza con una doble lectura (anexo 1: HATD).

La Toma de Decisiones Compartidas (TDC) es un modelo de atención participativo ubicado entre un estilo de atención paternalista e informativo que fomenta la participación de las mujeres para tomar una decisión con el profesional sanitario cuando existe algún grado de incertidumbre. La TDC se desarrolla durante el encuentro clínico, ambos actores se consideran como expertos: la mujer en su situación de salud, valores, creencias y preferencias. El profesional en la evidencia científica y en cómo dar información de las opciones terapéuticas disponibles.

# Guía práctica de implementación de la TDC para profesionales sanitarios

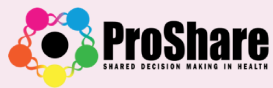

## Resultados

| Fase de la TDC                 | Puntos                   | Interpretación                                                                                                                                                                                      |
|--------------------------------|--------------------------|-----------------------------------------------------------------------------------------------------------------------------------------------------------------------------------------------------|
| Fase 1<br>"Crear equipo"       | <input type="checkbox"/> | 13 a 18 puntos:<br>adherente a la TDC<br>3 a 12 puntos:<br>sin adherencia a la TDC                                                                                                                  |
| Fase 2<br>"Plantear opciones"  | <input type="checkbox"/> | 13 a 18 puntos:<br>adherente a la TDC<br>3 a 12 puntos:<br>sin adherencia a la TDC                                                                                                                  |
| Fase 3<br>"Tomar una decisión" | <input type="checkbox"/> | 13 a 18 puntos:<br>adherente a la TDC<br>3 a 12 puntos:<br>sin adherencia a la TDC                                                                                                                  |
| <b>Puntuación total:</b>       | <input type="checkbox"/> | <b>46 a 54:</b><br>Fuerte adherencia a favor de la TDC<br><b>37 a 45:</b><br>Leve adherencia a la TDC<br><b>28 a 36:</b><br>Indiferencia a la TDC<br><b>9 a 27:</b><br>Falta de adherencia a la TDC |

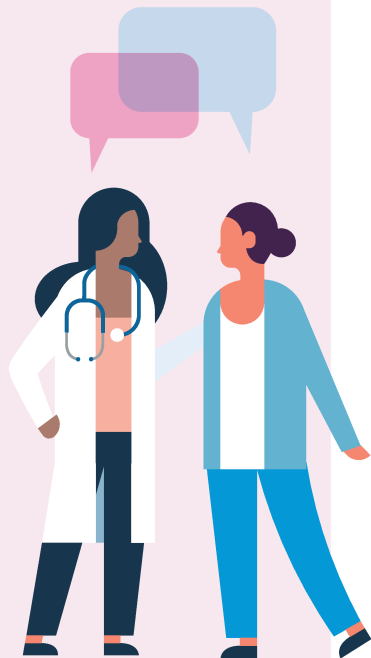

## Criterio

## Puntos\*

|                                                                                                                            | 1                        | 2                        | 3                        | 4                        | 5                        | 6                        |
|----------------------------------------------------------------------------------------------------------------------------|--------------------------|--------------------------|--------------------------|--------------------------|--------------------------|--------------------------|
| Informé claramente a la mujer de la necesidad de tomar una decisión sobre su participación en el cribado de cáncer de mama | <input type="checkbox"/> | <input type="checkbox"/> | <input type="checkbox"/> | <input type="checkbox"/> | <input type="checkbox"/> | <input type="checkbox"/> |
| Pregunté a la mujer de forma precisa cómo le gustaría participar en la toma de decisiones                                  | <input type="checkbox"/> | <input type="checkbox"/> | <input type="checkbox"/> | <input type="checkbox"/> | <input type="checkbox"/> | <input type="checkbox"/> |
| Informé a la mujer que existe la opción de participar o no en el cribado                                                   | <input type="checkbox"/> | <input type="checkbox"/> | <input type="checkbox"/> | <input type="checkbox"/> | <input type="checkbox"/> | <input type="checkbox"/> |
| Explicué claramente a la mujer las ventajas y desventajas de cada opción                                                   | <input type="checkbox"/> | <input type="checkbox"/> | <input type="checkbox"/> | <input type="checkbox"/> | <input type="checkbox"/> | <input type="checkbox"/> |
| Ayudé a la mujer a entender toda la información sobre beneficios y efectos adversos                                        | <input type="checkbox"/> | <input type="checkbox"/> | <input type="checkbox"/> | <input type="checkbox"/> | <input type="checkbox"/> | <input type="checkbox"/> |
| Pregunté a la mujer qué opción prefería                                                                                    | <input type="checkbox"/> | <input type="checkbox"/> | <input type="checkbox"/> | <input type="checkbox"/> | <input type="checkbox"/> | <input type="checkbox"/> |
| La mujer y yo hemos valorado ampliamente todas las opciones                                                                | <input type="checkbox"/> | <input type="checkbox"/> | <input type="checkbox"/> | <input type="checkbox"/> | <input type="checkbox"/> | <input type="checkbox"/> |
| La mujer y yo hemos escogido conjuntamente una opción                                                                      | <input type="checkbox"/> | <input type="checkbox"/> | <input type="checkbox"/> | <input type="checkbox"/> | <input type="checkbox"/> | <input type="checkbox"/> |
| La mujer y yo nos hemos puesto de acuerdo sobre el seguimiento de su atención sanitaria posterior                          | <input type="checkbox"/> | <input type="checkbox"/> | <input type="checkbox"/> | <input type="checkbox"/> | <input type="checkbox"/> | <input type="checkbox"/> |

\* La puntuación va de: "Totalmente en desacuerdo" (1) a "Totalmente de acuerdo" (6)

De las Cuevas C, Perestelo-Perez L, Rivero-Santana A, Cebolla-Martí A, Scholl I, Härter M. Validation of the Spanish version of the 9-item Shared Decision-Making Questionnaire. *Health Expect [Internet]*. 2015;18(6):2143–53. Available from: <http://www.ncbi.nlm.nih.gov/pubmed/24593044>
